# Supplementary material for: Mn(ii)-MOF nanoparticles conjugated with EOB-PEG as high-performance hepatobiliary-specific MRI contrast agents
Source: Royal Society of Chemistry journal article supplement (doi:10.1039/d4nr05293e), 2025-01-01
Supplement: d4nr05293e1.pdf [file d4nr05293e1.pdf]

## Supporting Information

### **Mn(II)-MOF Nanoparticle Conjugated with EOB-PEG as High-Performance Hepatobiliary-Specific MRI Contrast Agent**

Gengshen Mo,<sup>a,b,†</sup> Xingjiang Li,<sup>c,†</sup> Yong Jian,<sup>b</sup> Weiyuan Xu,<sup>b</sup> Xinhui Xiao,<sup>b</sup> Aiyi Chen,<sup>b</sup> Yinghui Ding,<sup>b</sup> Xin Jiang,<sup>d</sup> Jianliang Shen,<sup>d</sup> Lihai Fan,<sup>\*a</sup> Zhiqiang Wang,<sup>\*c</sup> and Lixiong Dai<sup>\*,b</sup>

<sup>a</sup> College of Chemical Engineering, Fujian Engineering Research Center of Advanced Manufacturing Technology for Fine Chemicals, Fuzhou University, Fuzhou, Fujian 350108, China; Qingyuan Innovation Laboratory, Quanzhou, Fujian 362801, China.

<sup>b</sup> Wenzhou Key Laboratory of Biophysics, Wenzhou Institute, University of Chinese Academy of Sciences, Wenzhou, Zhejiang 325000, China.

<sup>c</sup> Department of Radiology, Wenzhou Hospital of Integrated Traditional Chinese and Western Medicine, Wenzhou, Zhejiang 325000, China.

<sup>d</sup> National Engineering Research Center of Ophthalmology and Optometry, Eye Hospital, Wenzhou Medical University, Wenzhou, Zhejiang 325027, China.

\*Corresponding authors.

E-mail address: [fanlh@fzu.edu.cn](mailto:fanlh@fzu.edu.cn); [cn\\_boy2000@wmu.edu.cn](mailto:cn_boy2000@wmu.edu.cn); [dailx@ucas.ac.cn](mailto:dailx@ucas.ac.cn)

† These authors contributed equally to this work.

## Figures

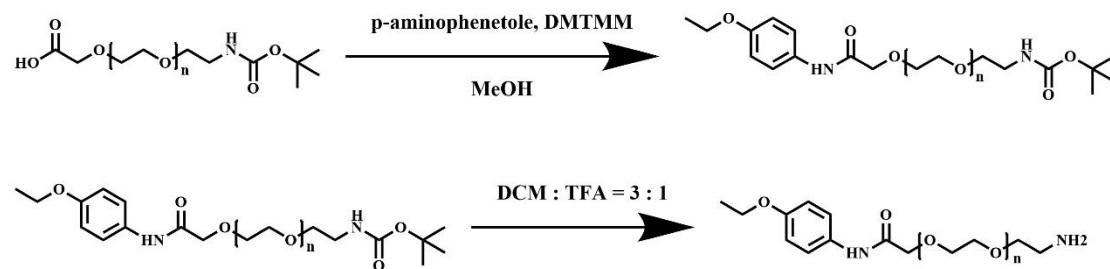

Figure S1. A complete synthetic route to the ligand NH<sub>2</sub>-PEG-EOB.

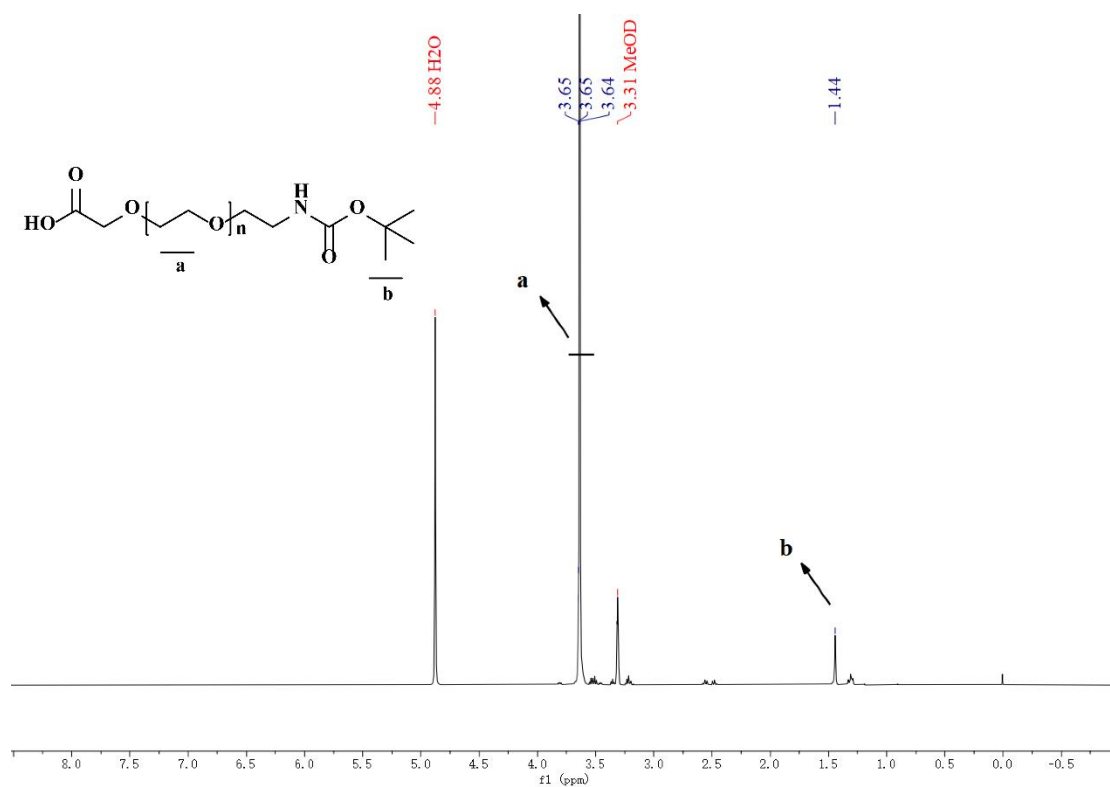

Figure S2. <sup>1</sup>H NMR spectrum of BocNH-PEG-COOH.

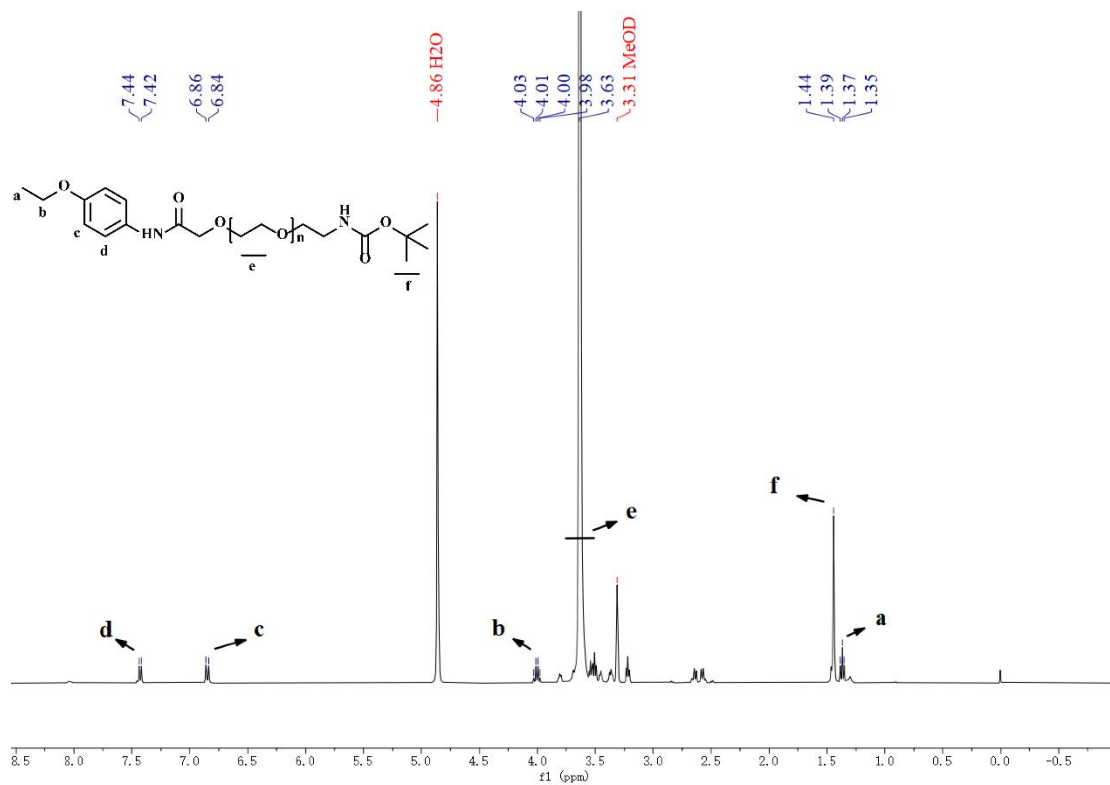

Figure S3. <sup>1</sup>H NMR spectrum of BocNH-PEG-EOB.

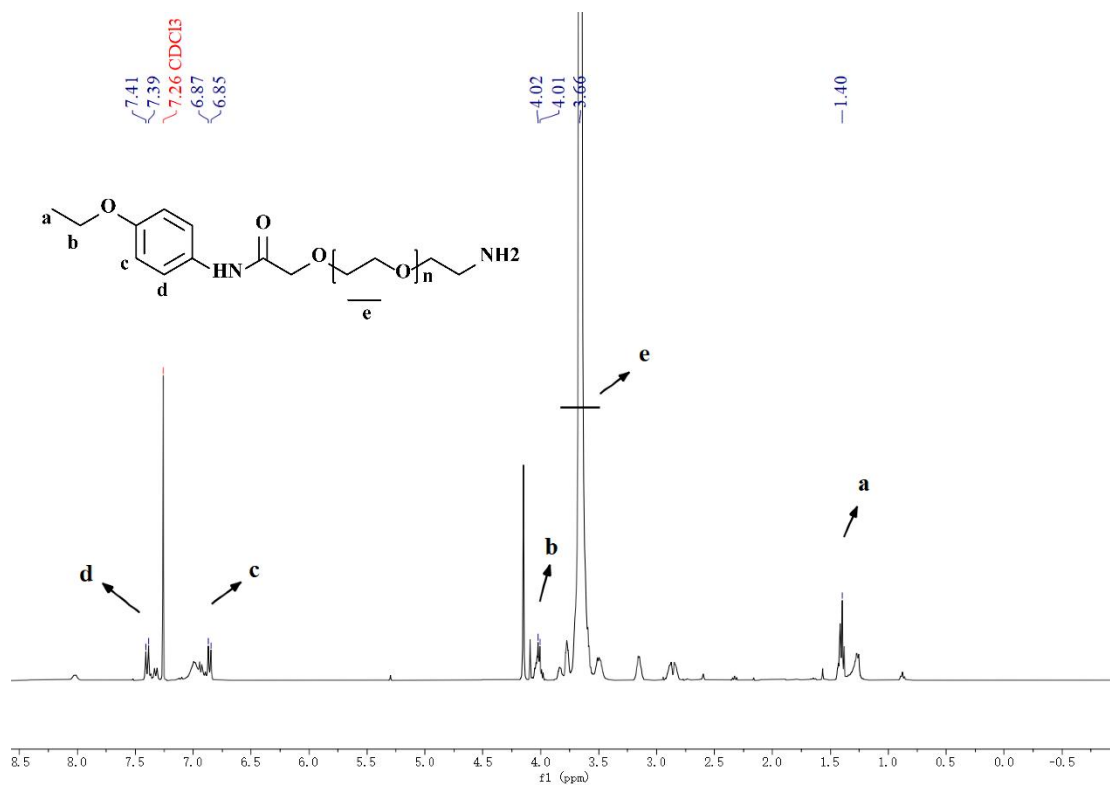

Figure S4. <sup>1</sup>H NMR spectrum of NH<sub>2</sub>-PEG-EOB.

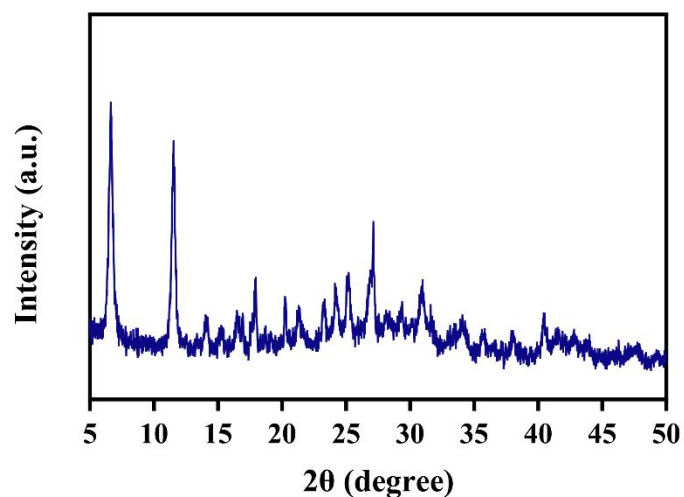

Figure S5. PXRD patterns for Mn-MOF-74.

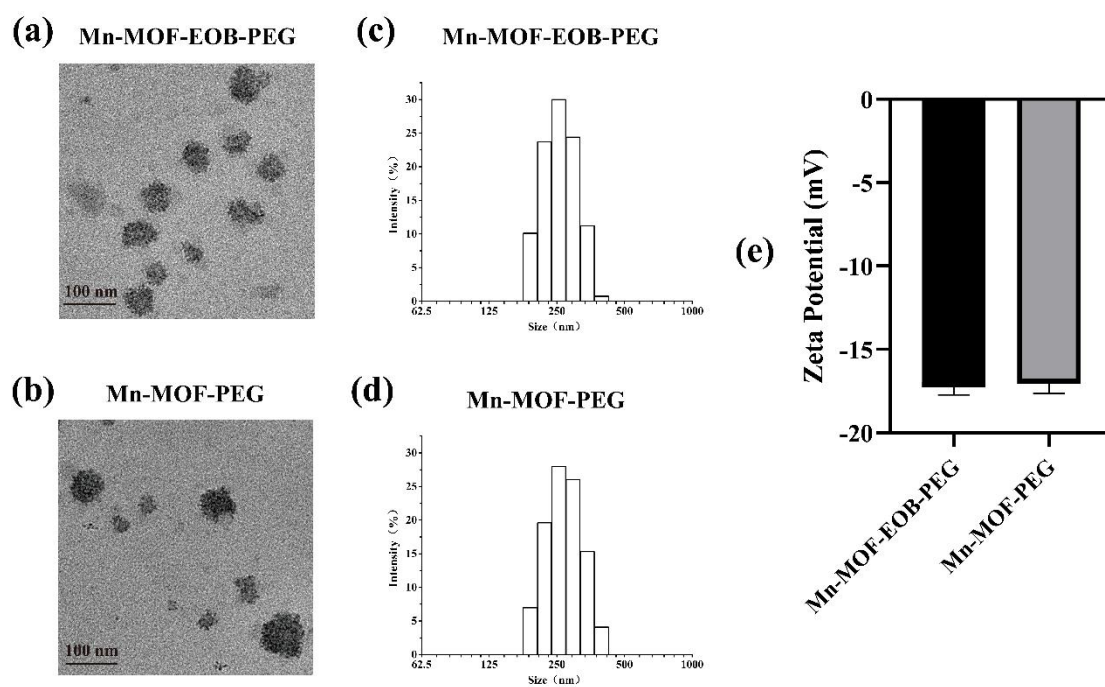

Figure S6. (a) and (b) TEM images of Mn-MOF-EOB-PEG and Mn-MOF-PEG. (c) and (d) Hydrodynamic diameter of Mn-MOF-EOB-PEG and Mn-MOF-PEG nanoparticles. (e) Zeta potential of Mn-MOF-EOB-PEG and Mn-MOF-PEG.

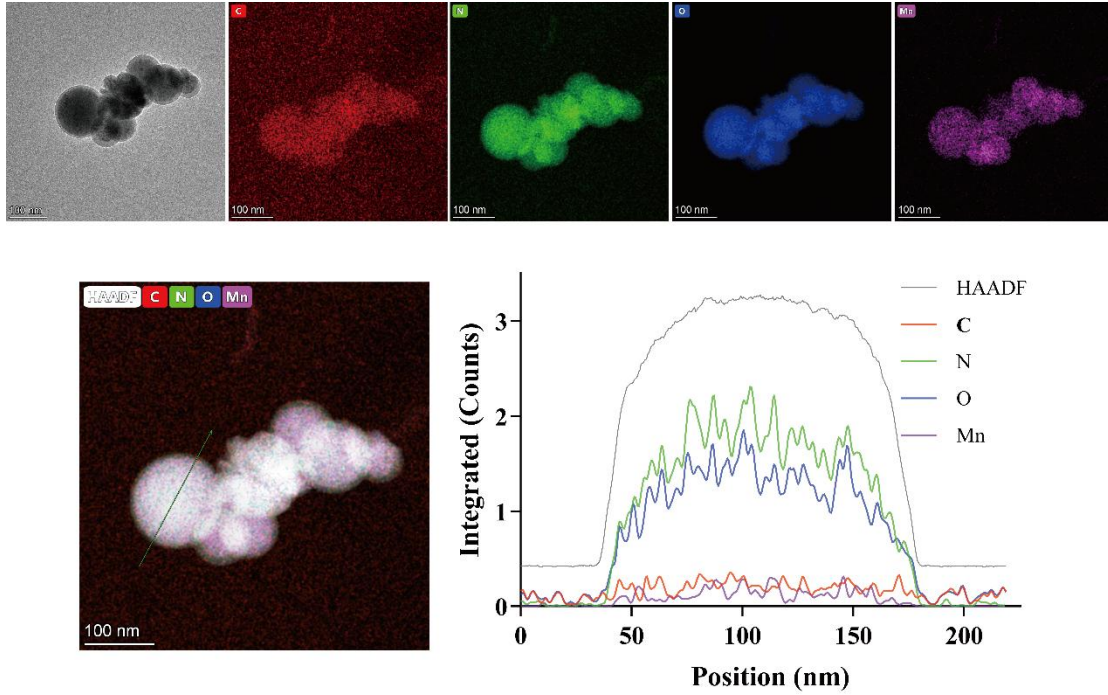

Figure S7. EDS spectra of Mn-MOF-EOB-PEG (scale bar = 100 nm).

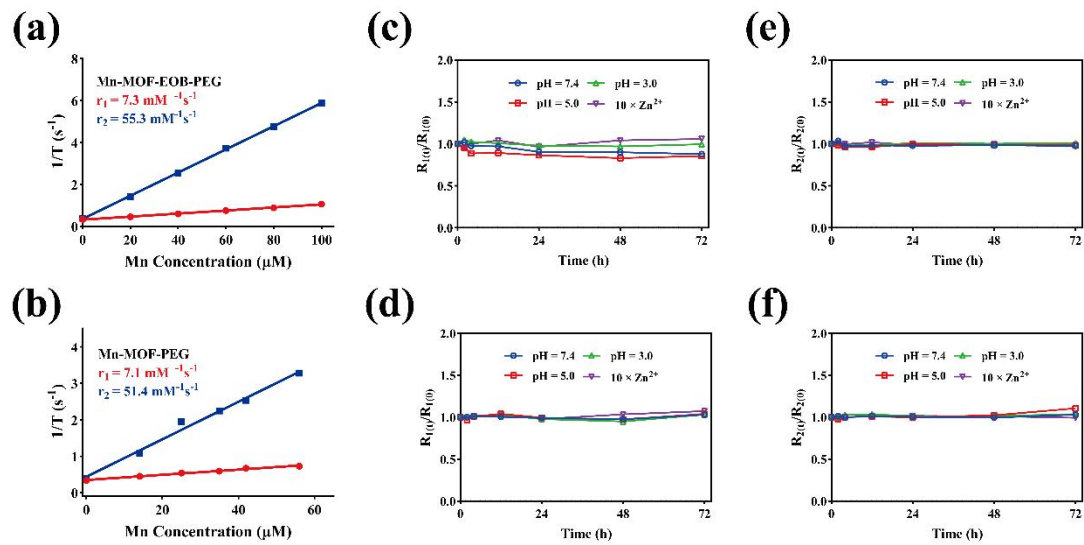

Figure S8. (a) and (b) Relaxivity of Mn-MOF-EOB-PEG and Mn-MOF-PEG in  $\text{H}_2\text{O}$ . (c and d)  $R_{1(t)}/R_{1(0)}$  ratio and (e and f)  $R_{2(t)}/R_{2(0)}$  ratio of Mn-MOF-EOB-PEG and Mn-MOF-PEG nanoparticles before and after incubated in different media (PBS with different pH : 7.4, 5.0 and 3.0, and  $10 \times \text{Zn}^{2+}$ ) at  $37^\circ\text{C}$ , respectively.
